# Supplementary material
Source: Research Square preprint supplement (doi:10.21203/rs.3.rs-9129857/v1)
Supplement: Supplementary file 1 [file 15597f0bcac5b629b006fbb4.doc]

**Table 5 Comparison AVH/MVH/PVH/Cobb angle of Two Groups**

|  | **Preoperative** | **Postoperative 1 month** | **Postoperative 1 year** |
| --- | --- | --- | --- |
| **AVH** |  |  |  |
| **PVP** | 14.71 ± 4.38 | 18.71 ± 3.34**b** | 16.74 ± 4.72**bc** |
| **CAT** | 15.00 ± 3.77 | 20.64 ± 3.69**b** | 20.00 ± 3.91**b** |
| **t** | 0.296 | 2.307 | 3.141 |
| **P-Value** | 0.768 | **0.024a** | **0.002a** |
| **MVH** |  |  |  |
| **PVP** | 15.34 ± 4.58 | 19.92 ± 4.25**b** | 17.71 ± 4.84**bc** |
| **CAT** | 16.79 ± 4.49 | 22.12 ± 4.75**b** | 21.36 ± 4.95**b** |
| **t** | 1.338 | 2.058 | 3.134 |
| **P-Value** | 0.185 | **0.043a** | **0.003a** |
| **PVH** |  |  |  |
| **PVP** | 29.94 ± 3.12 | 30.16 ± 2.92 | 29.76 ± 3.04 |
| **CAT** | 29.48 ± 3.09 | 29.69 ± 3.45 | 29.09 ± 3.62 |
| **t** | 0.626 | 0.609 | 0.850 |
| **P-Value** | 0.534 | 0.545 | 0.398 |
| **Cobb angle** |  |  |  |
| **PVP** | 26.55 ± 9.43 | 14.29 ± 4.05**b** | 15.74 ± 4.11**bc** |
| **CAT** | 27.09 ± 9.55 | 12.36 ± 3.52**b** | 12.11 ± 3.32**b** |
| **t** | 0.238 | 2.124 | 3.360 |
| **P-Value** | 0.812 | **0.037a** | **0.001a** |

PVP: percutaneous vertebroplasty; CAT: cement anchoring technique; AVH: Anterior vertebral height, MVH: middle vertebral height, PVH: posterior vertebral height.

a: Independent Samples Test, P < 0.05

b: Paired Samples Test with Preoperation, P<0.05

c: Paired Samples Test with Postoperative 1 month, P<0.05
