# Supplementary material
Source: Research Square preprint supplement (doi:10.21203/rs.3.rs-9129857/v1)
Supplement: Supplementary file 2 [file 3b7d3d61632f0fc2eb817a52.doc]

**Table 4 Comparison ODI% of Two Groups**

|  | **Preoperative** | **Postoperative 3 months** | **Postoperative 1 year** |
| --- | --- | --- | --- |
| **PVP** | 66.19 ± 8.59 | 23.74 ± 3.93**b** | 17.51 ± 2.46**b** |
| **CAT** | 67.90 ± 5.24 | 18.87 ± 3.05**b** | 13.09± 1.43**b** |
| **t** | 0.998 | 5.781 | 9.077 |
| **P-Value** | 0.322 | **0.000a** | **0.000a** |

PVP: percutaneous vertebroplasty; CAT: cement anchoring technique

a: Independent Samples Test, P < 0.05

b: Paired Samples Test with Preoperation, P<0.05
