# Supplementary material
Source: Research Square preprint supplement (doi:10.21203/rs.3.rs-9129857/v1)
Supplement: Supplementary file 3 [file a8feb4b73bedd565b36cd361.doc]

**Table 3 Comparison VAS Scores of Two Groups**

|  | **Preoperative** | **Postoperative 1 month** | **Postoperative 1 year** |
| --- | --- | --- | --- |
| **PVP** | 8.82 ± 1.31 | 2.82 ± 1.04**b** | 1.37 ± 1.05**b** |
| **CAT** | 9.12 ± 0.93 | 2.15 ± 0.94**b** | 0.82 ± 0.47**b** |
| **t** | 1.116 | 2.813 | 2.780 |
| **P-Value** | 0.268 | **0.006a** | **0.007a** |

PVP: percutaneous vertebroplasty; CAT: cement anchoring technique

a: Independent Samples Test, P < 0.05

b: Paired Samples Test with Preoperation, P<0.05
