# Supplementary material
Source: Research Square preprint supplement (doi:10.21203/rs.3.rs-9129857/v1)
Supplement: Supplementary file 4 [file c0be041298b34c837ff8d4ab.doc]

**Table 1 Comparison of General Information** **between Two Groups**

|  | **PVP** | **CAT** | **t/X2** | **P-Value** |
| --- | --- | --- | --- | --- |
| No. | 38 | 33 |  |  |
| Gender |  |  |  |  |
| Male | 13 | 8 |  |  |
| Female | 25 | 25 | 0.843 | 0.359 |
| Age (years) | 68.61 ± 8.45 | 70.42 ± 8.35 | 0.910 | 0.366 |
| BMI | 24.62 ± 4.55 | 25.93 ± 1.74 | 1.551 | 0.125 |
| Lumbar BMD (T) | -4.05 ± 0.80 | -3.82 ± 0.74 | 1.226 | 0.225 |
| Duration of disease (months) | 9.05 ± 1.98 | 8.97 ± 2.01 | 0.175 | 0.862 |
| Fracture type |  |  |  |  |
| Wedge | 16 | 22 |  |  |
| Biconcave | 14 | 19 | 2.979 | 0.226 |
| Compression Ratio |  |  |  |  |
| Grade Ⅰ (20–25 % ) | 15 | 9 |  |  |
| Grade Ⅱ (26–40 % ) | 14 | 10 |  |  |
| Grade Ⅲ (≥40% ) | 9 | 14 | 2.916 | 0.233 |
| Follow-up time (months) | 34.13 ± 8.805 | 33.58 ± 11.49 | 0.230 | 0.819 |

PVP: percutaneous vertebroplasty; CAT: cement anchoring technique
